# Supplementary material for: Characterization of Silver Nanoparticles under Environmentally Relevant Conditions Using Asymmetrical Flow Field-Flow Fractionation (AF4)
Source: PLOS journal article supplement (doi:10.1371/journal.pone.0143149), 2015-11-17
Supplement: S3 (10.1371/journal.pone.0143149.s003) [file journal.pone.0143149.s003]

S1 File. FFF and Stokes-Einstein equation.

One of the advantages of FFF is that elution time under identical conditions is related to particle size and follows a linear correlation. To calculate the modal size of nanoparticles, a simplified form of the FFF equation (Eq. (1)) and Stokes-Einstein equation (Eq. (2)) were used.

$$t_r = \frac{W^2}{6Dh(1+F_c/F_{out})} \quad (1)$$

$$D = \frac{K_B T}{6\pi\eta r} \quad (2)$$

Where,  $t_r$ ,  $W$ ,  $D$ ,  $F_c$ ,  $F_{out}$ ,  $K_b$ ,  $T$ ,  $\eta$ , and  $r$  are retention time, channel height (thickness of spacer), diffusion coefficient of the particles, cross flow, channel flow, Boltzman's constant, temperature (K), dynamic viscosity of fluid (e.g.,  $0.01 \text{ gm cm}^{-1} \text{ s}^{-1}$  for water) and radius of particle, respectively.
